# Supplementary material
Source: publisher figshare collection journal article supplement (https://tandf.figshare.com/articles/dataset/_/9545174)

Methods — MHolm — Tarone-Holm — Holm

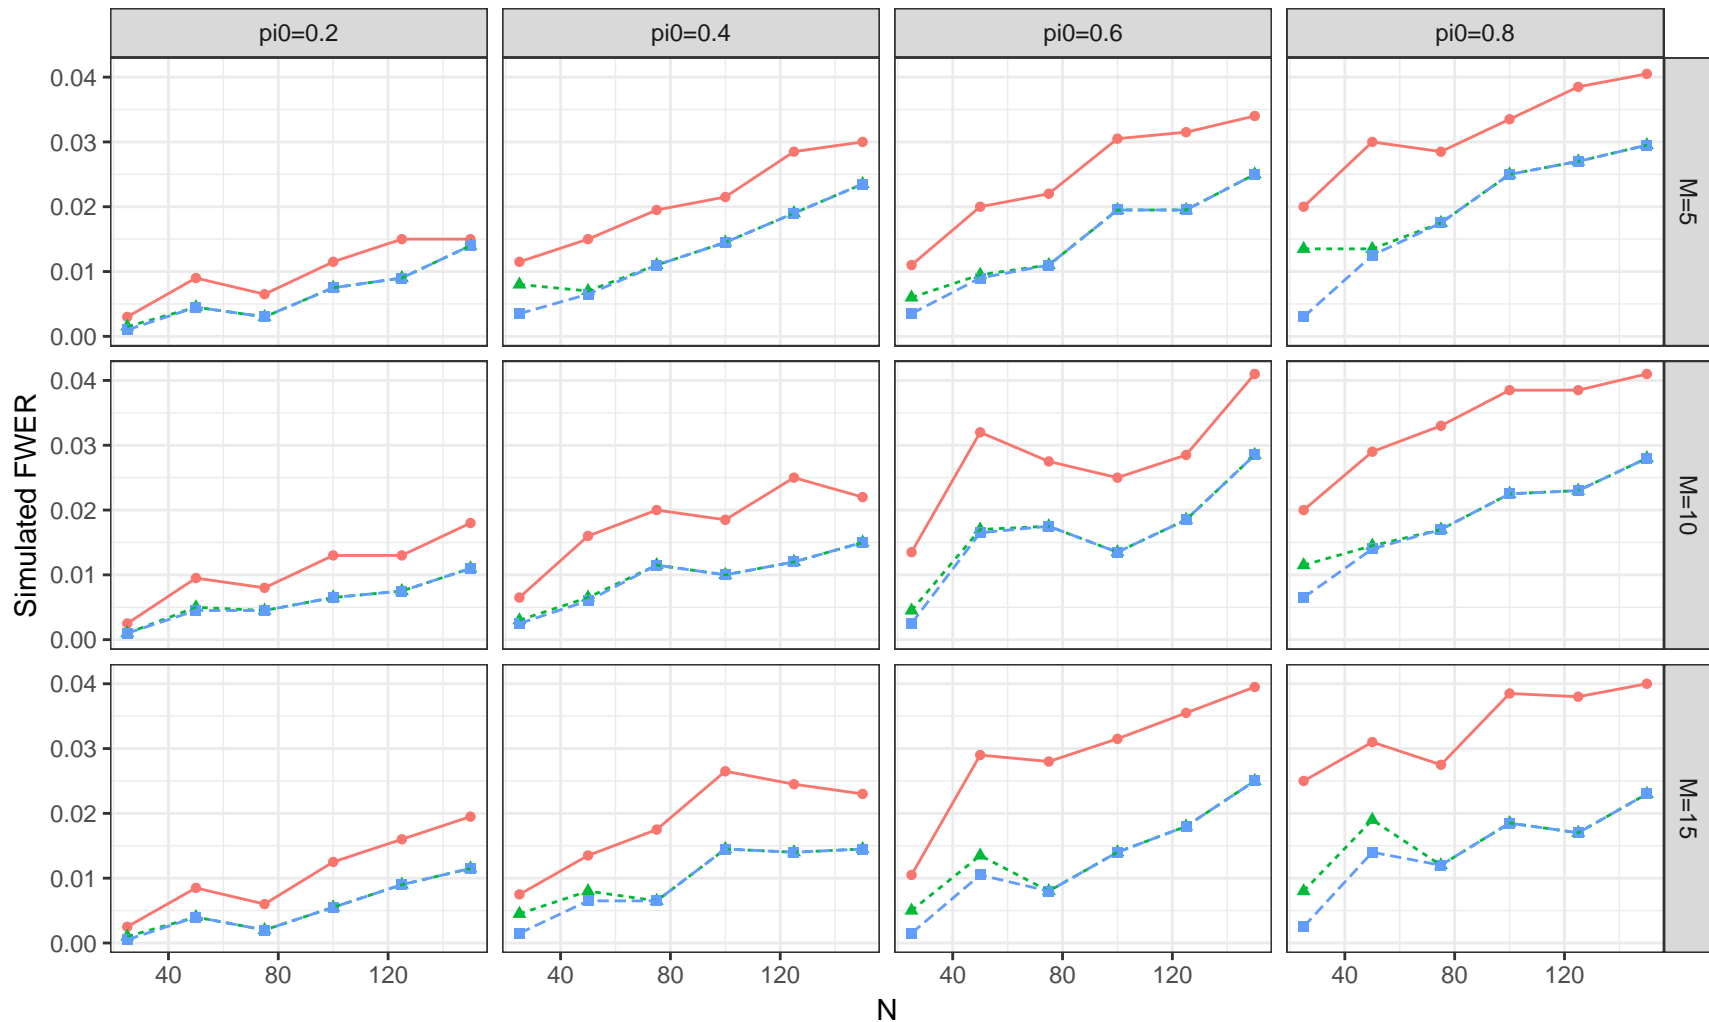

Supplement: Supplementary file 2 [file 2]

Methods —●— MHolm —▲— Tarone-Holm —■— Holm

Simulated Minimal Power

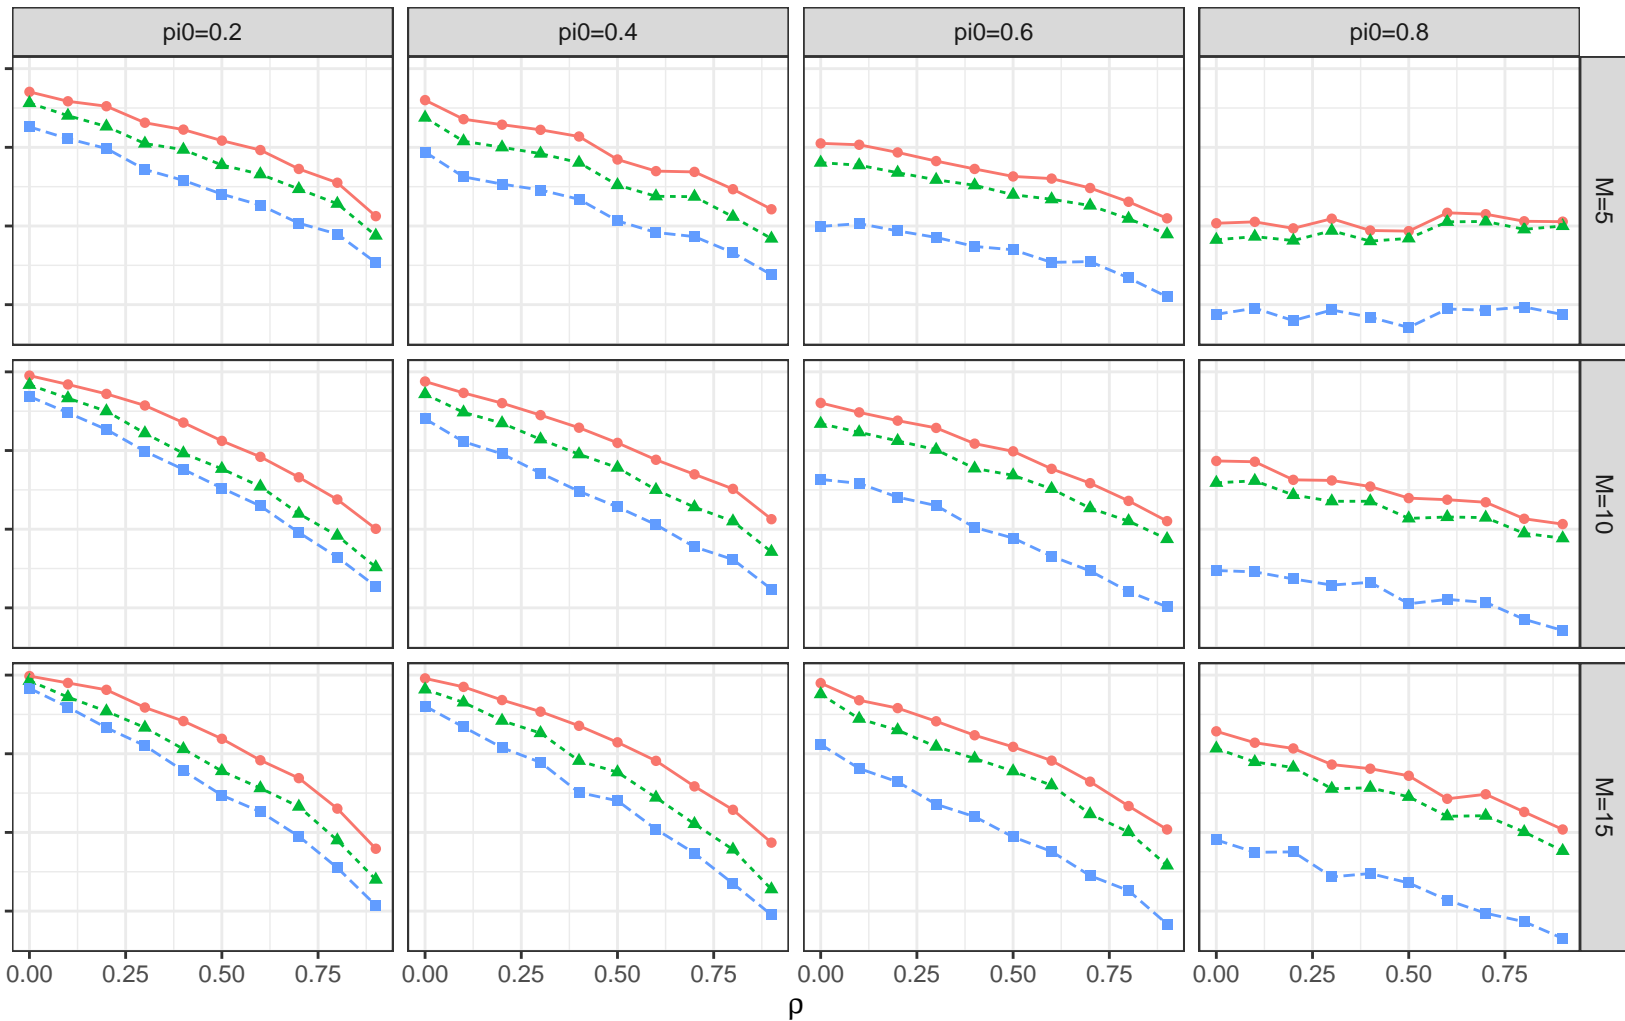

Supplement: Supplementary file 3 [file 2]

Methods — MHolm — Tarone-Holm — Holm

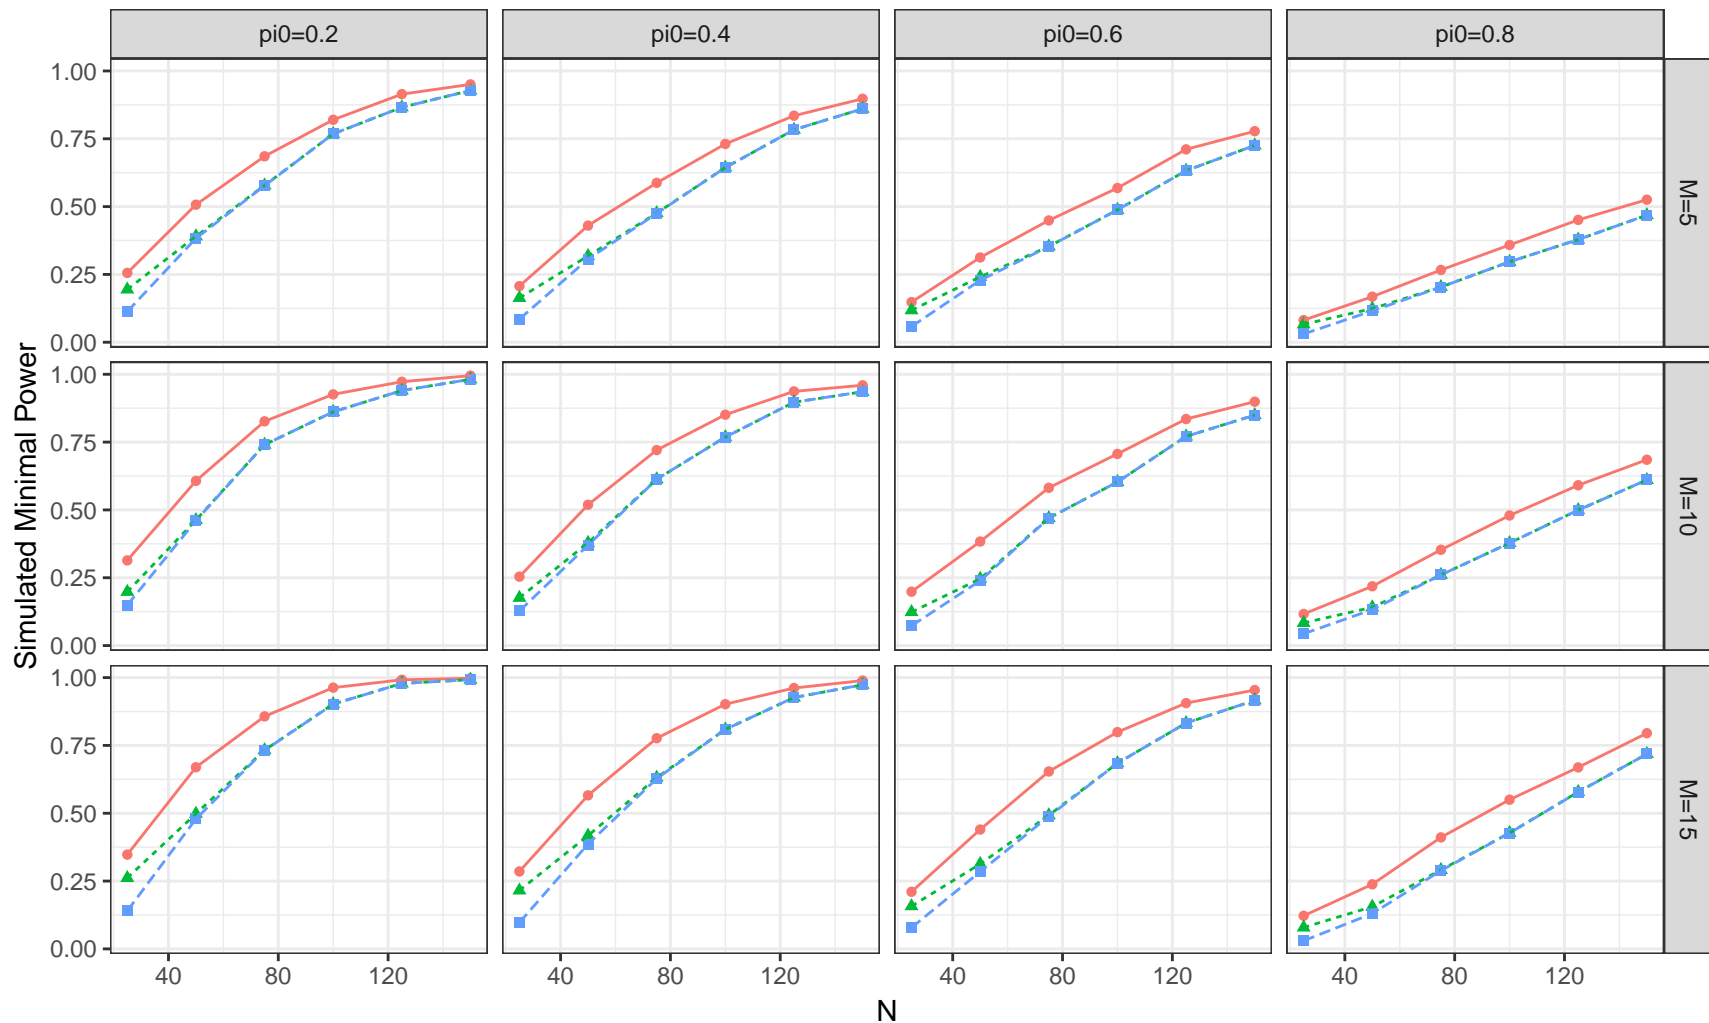

Supplement: Supplementary file 4 [file 2]

Methods — MHOch — Roth — Hochberg

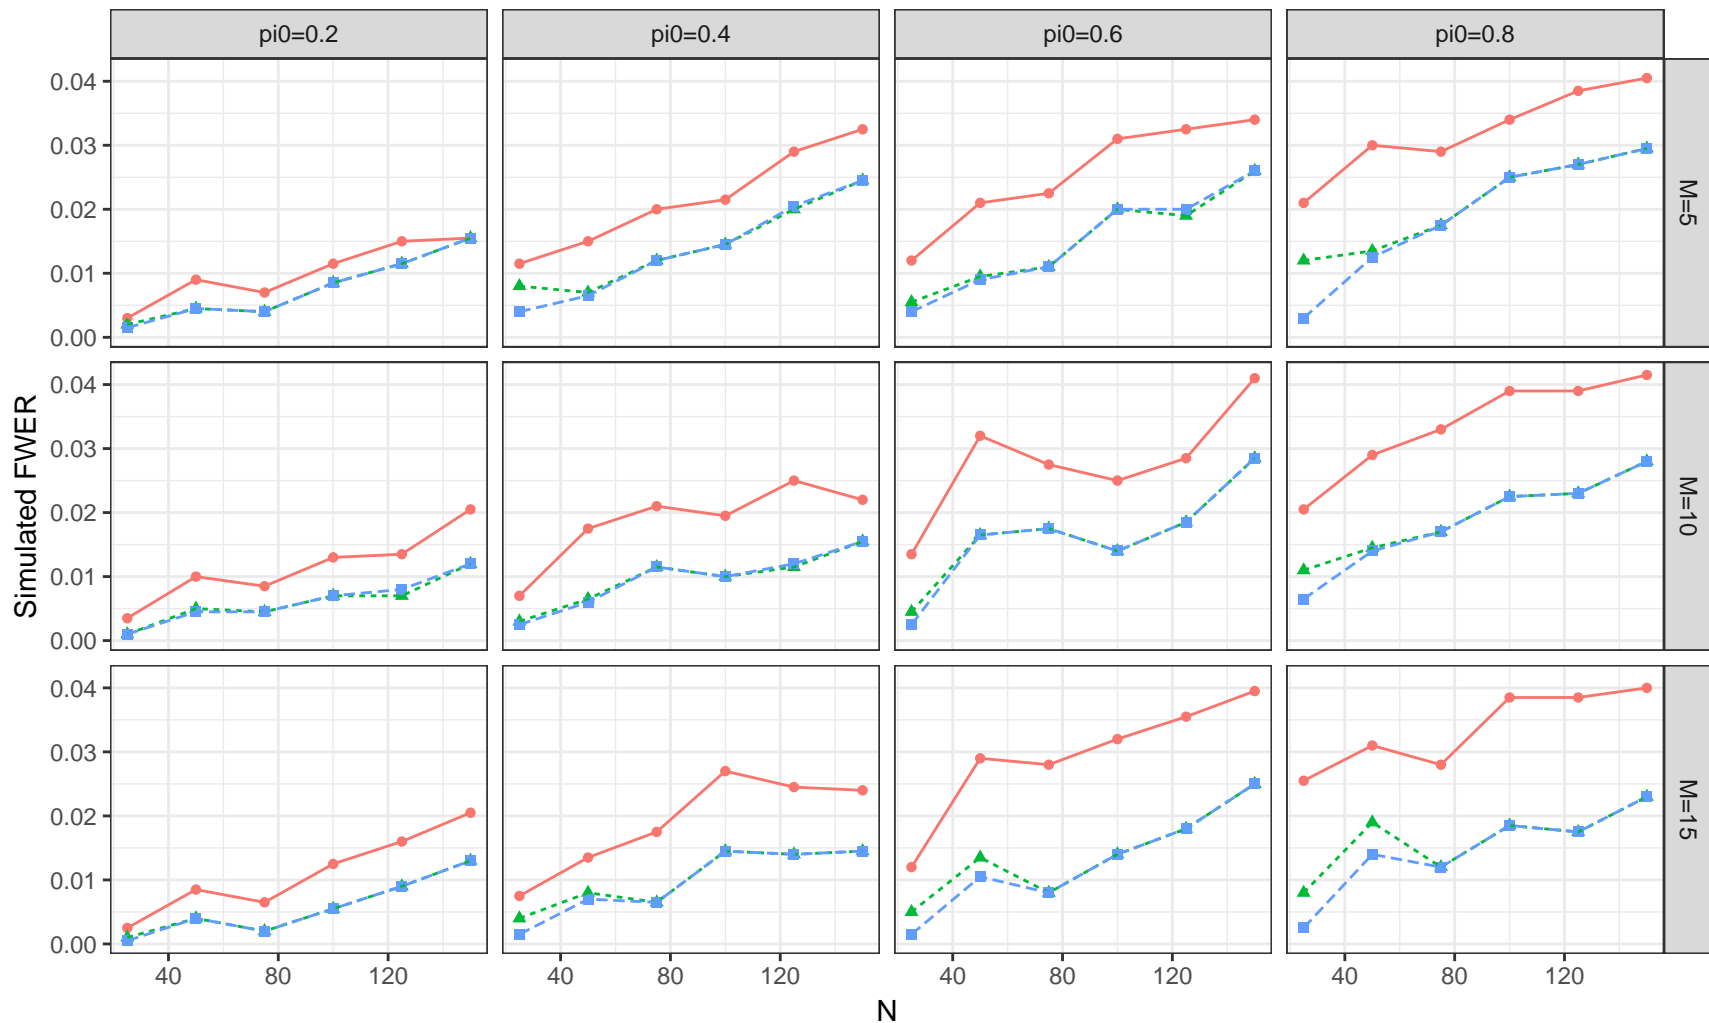

Supplement: Supplementary file 5 [file 2]

Methods — M Hoch — Roth — Hochberg

Simulated Minimal Power

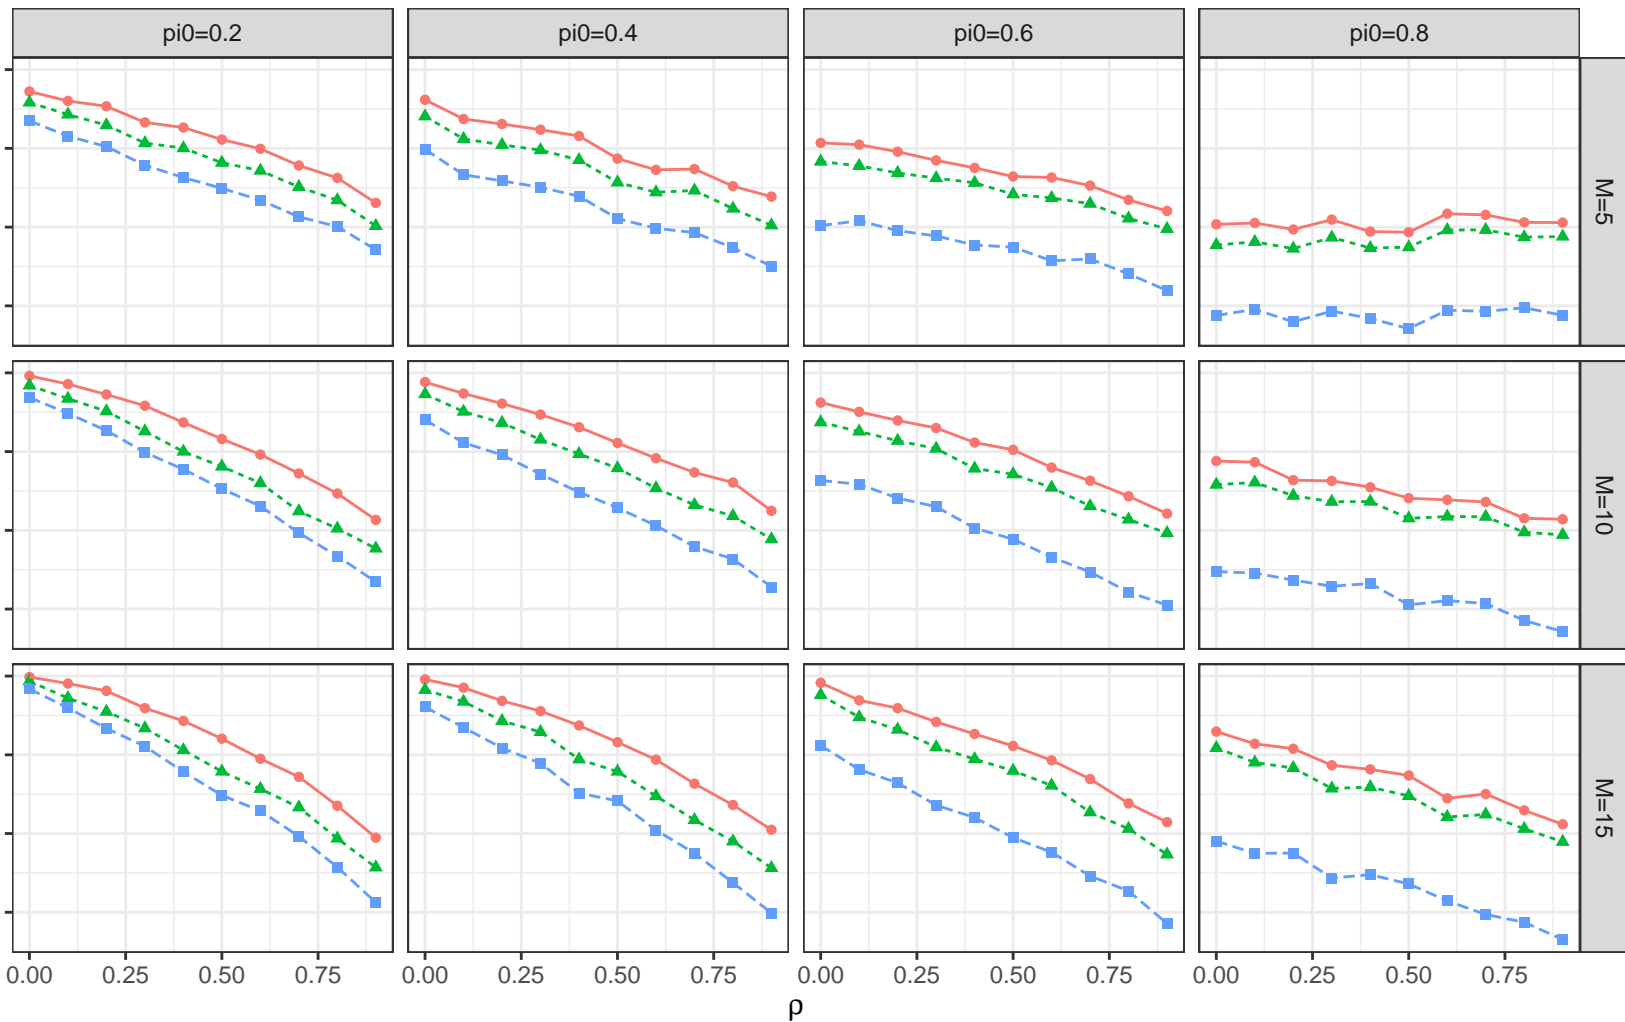

Supplement: Supplementary file 6 [file 2]

Methods — MHoch — Roth — Hochberg

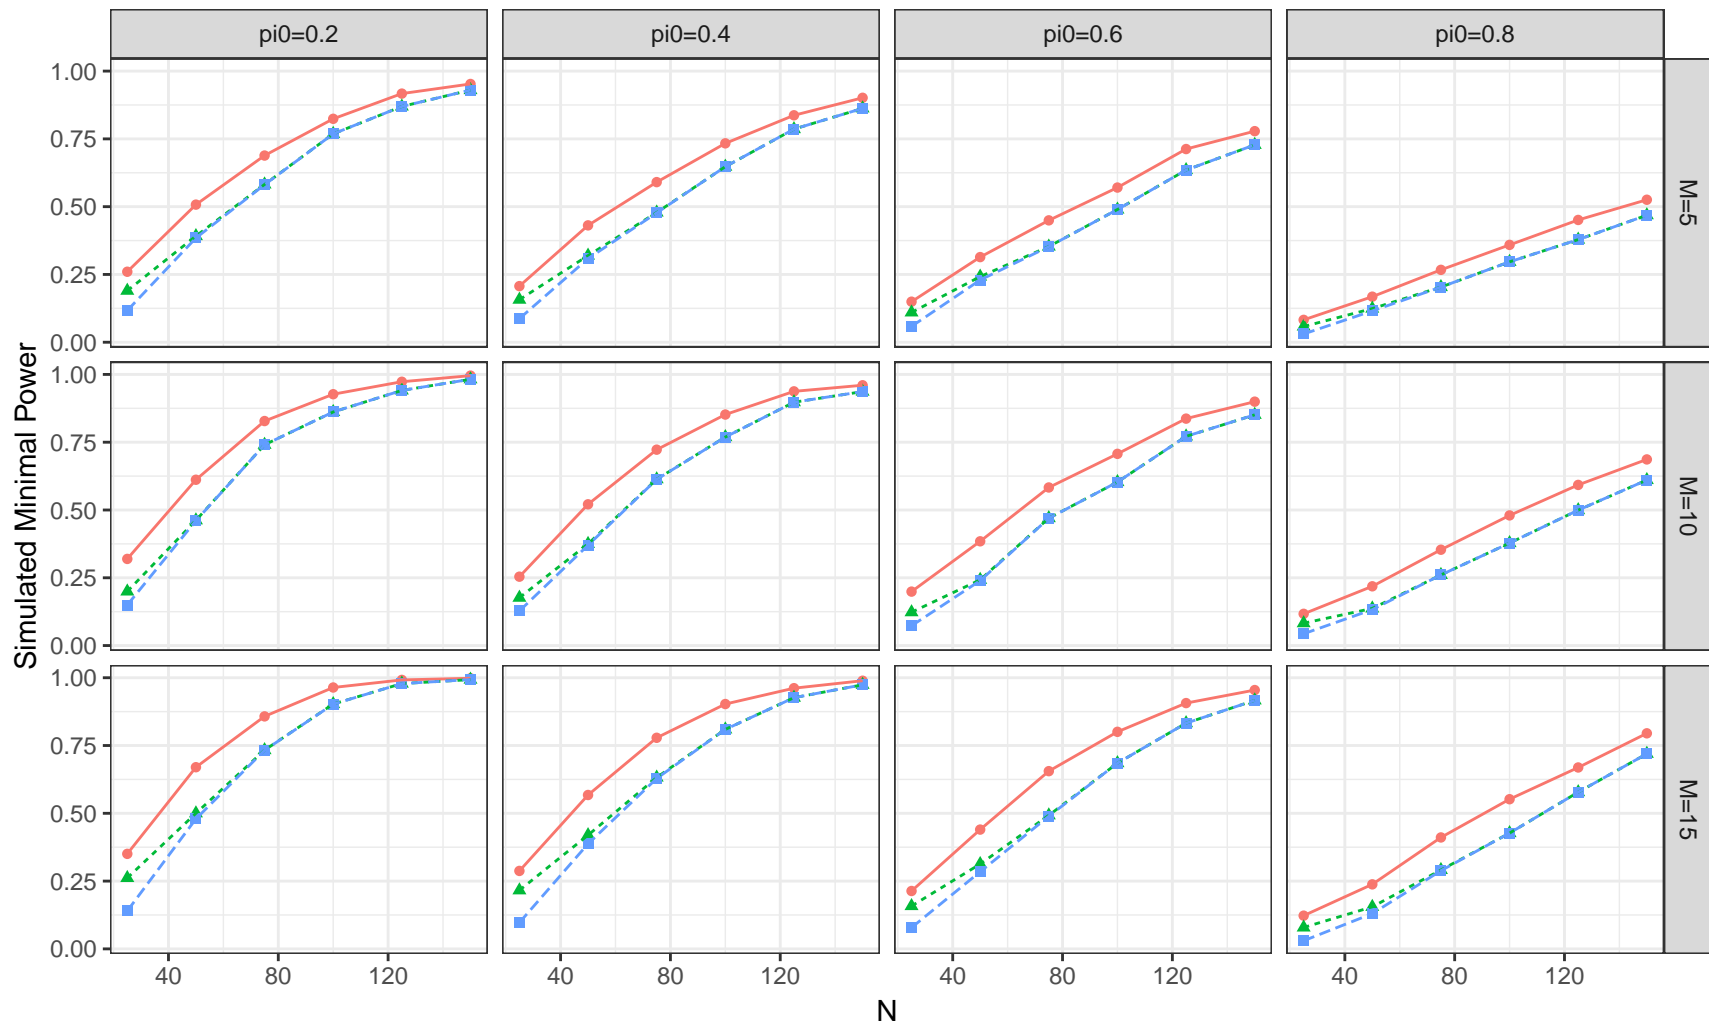

Supplement: Supplementary file 7 [file 2]

Methods — MHolm — Tarone-Holm — Holm

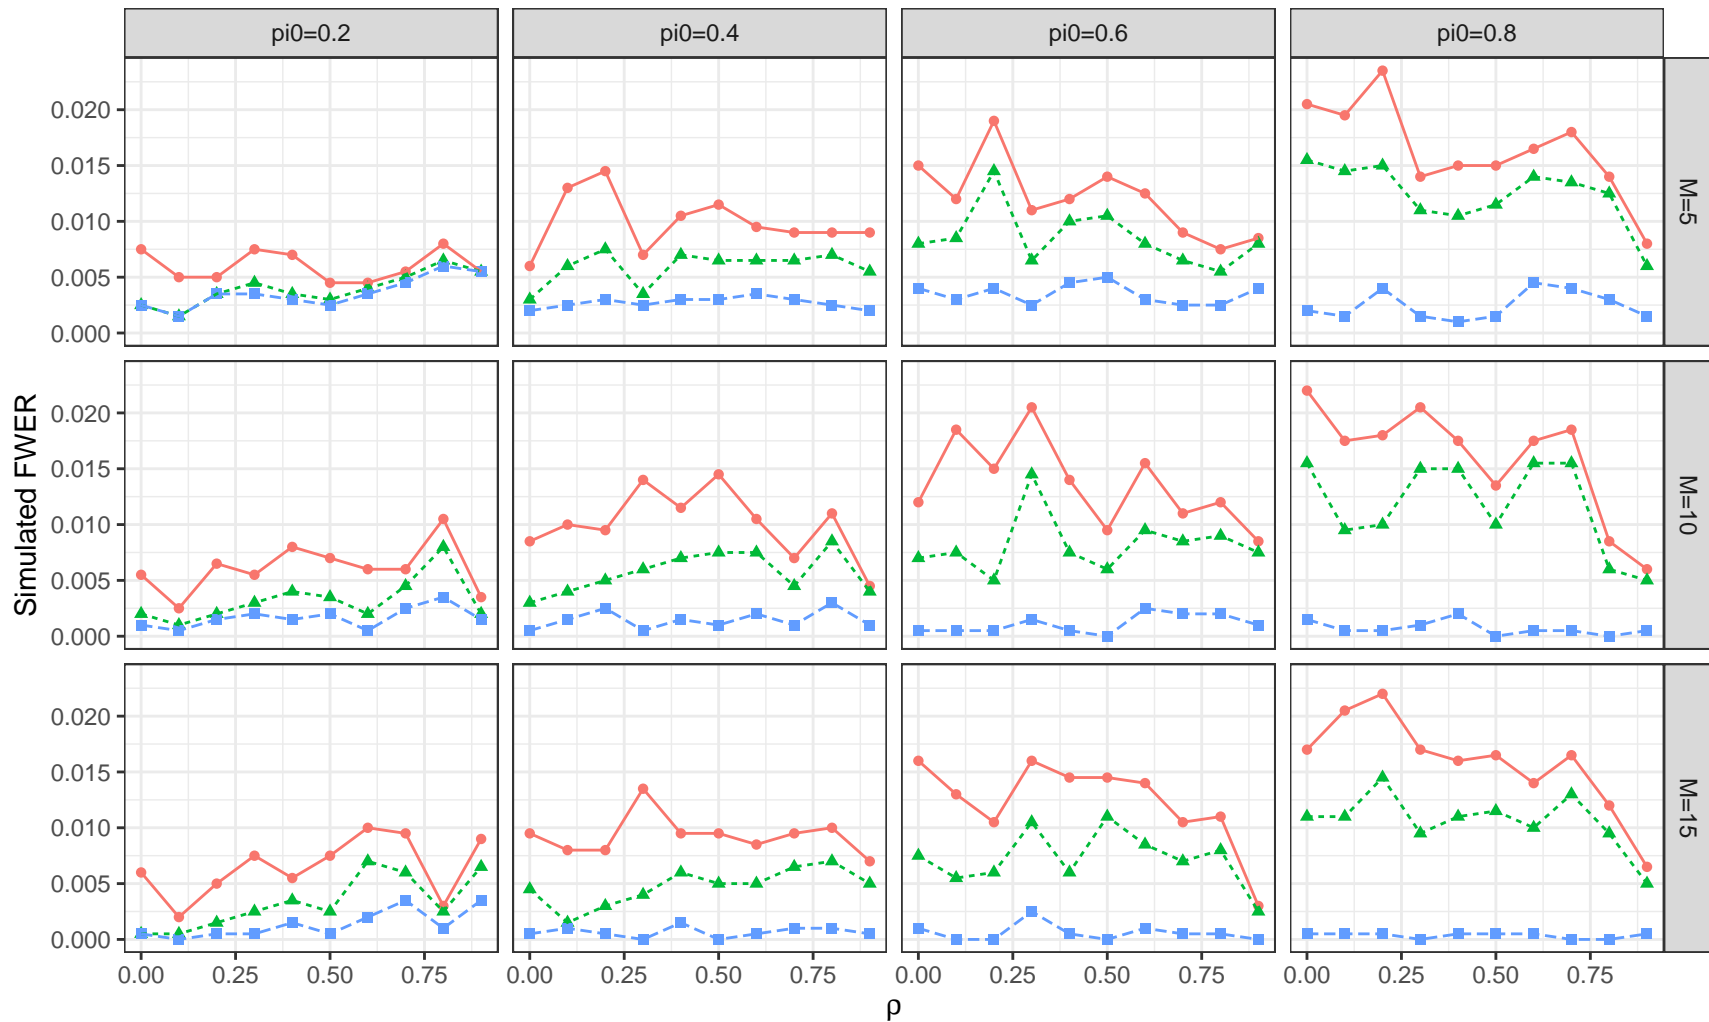

Supplement: Supplementary file 8 [file 2]

Methods — MHoch — Roth — Hochberg

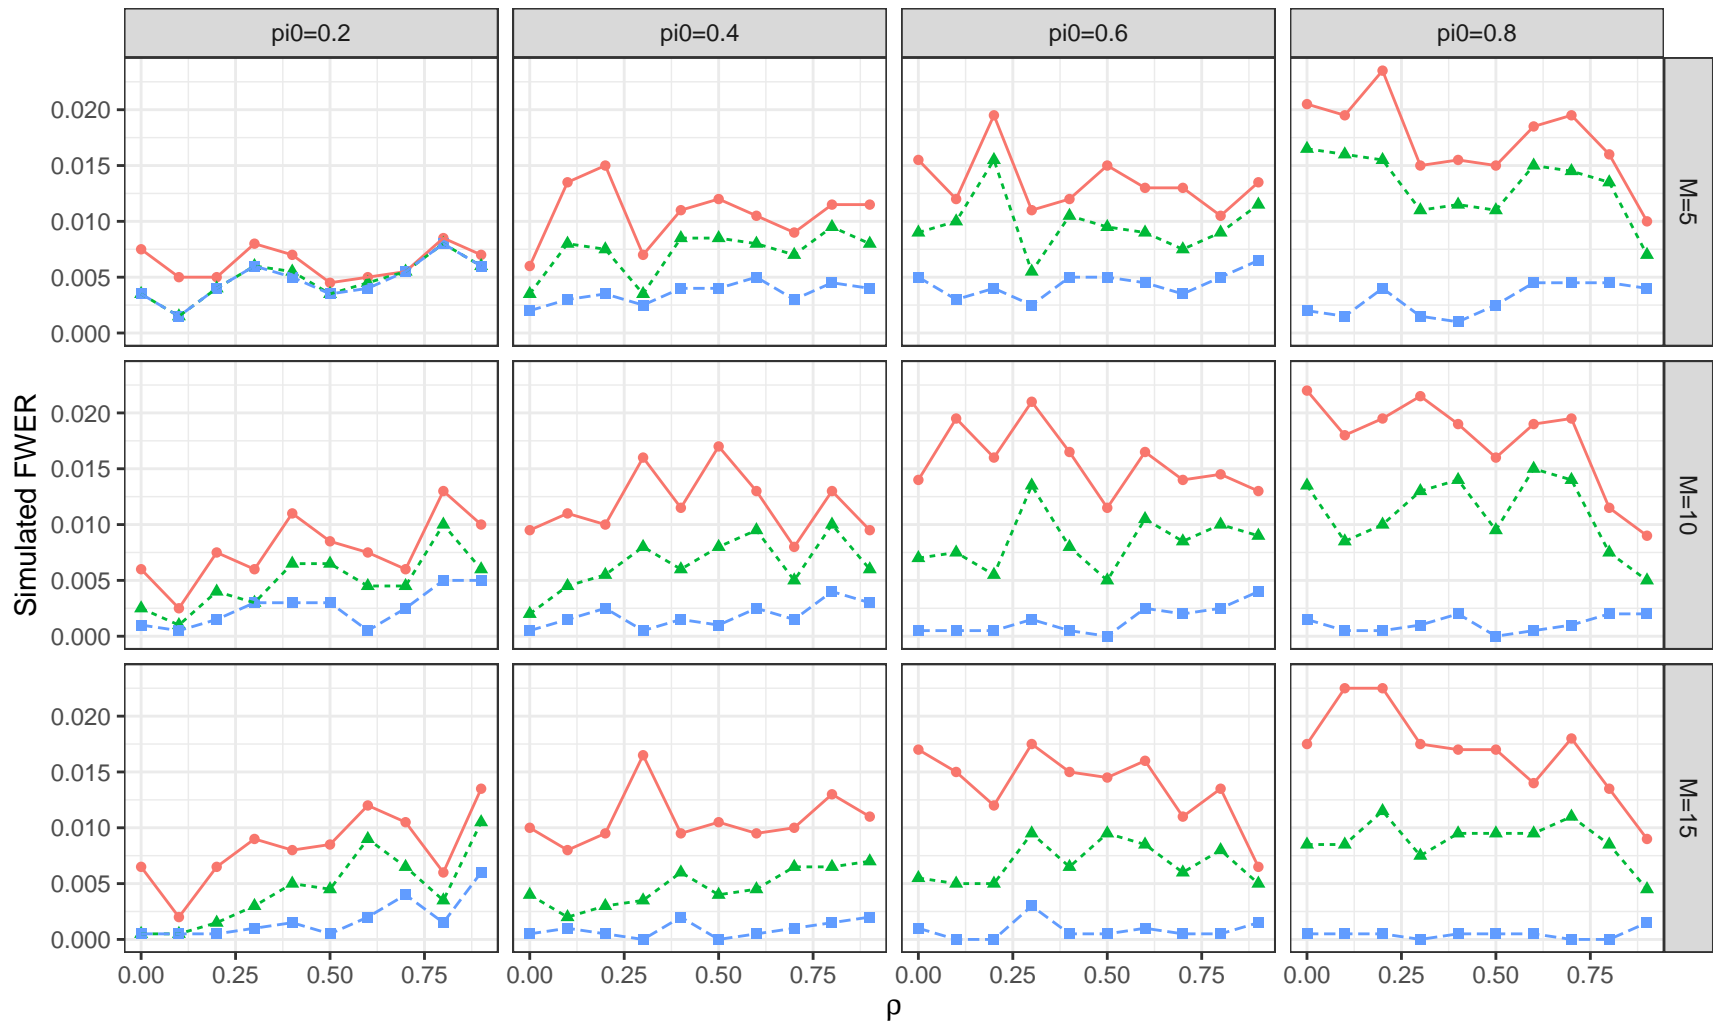

Supplement: Supplementary file 9 [file 2]
